# Supplementary material for: Body fluid derived exosomes as a novel template for clinical diagnostics
Source: Springer Nature journal article supplement (doi:10.1186/1479-5876-9-86), 2011-06-08

**A**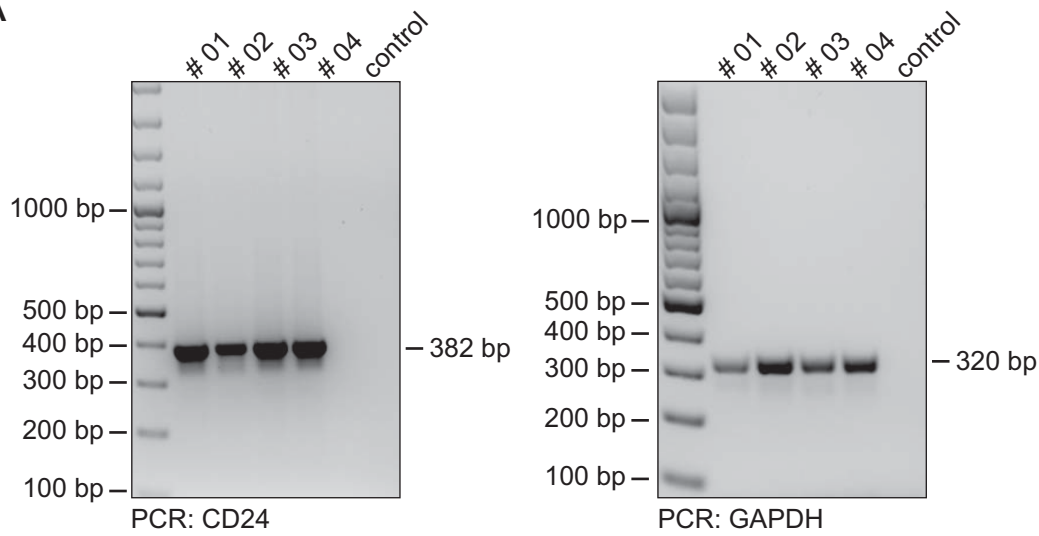**B**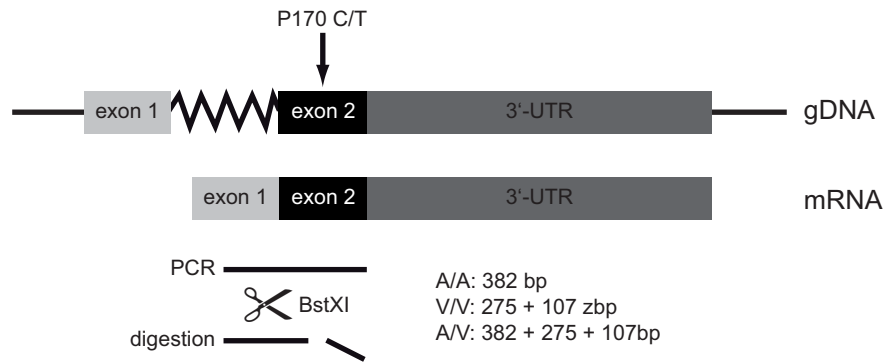**C**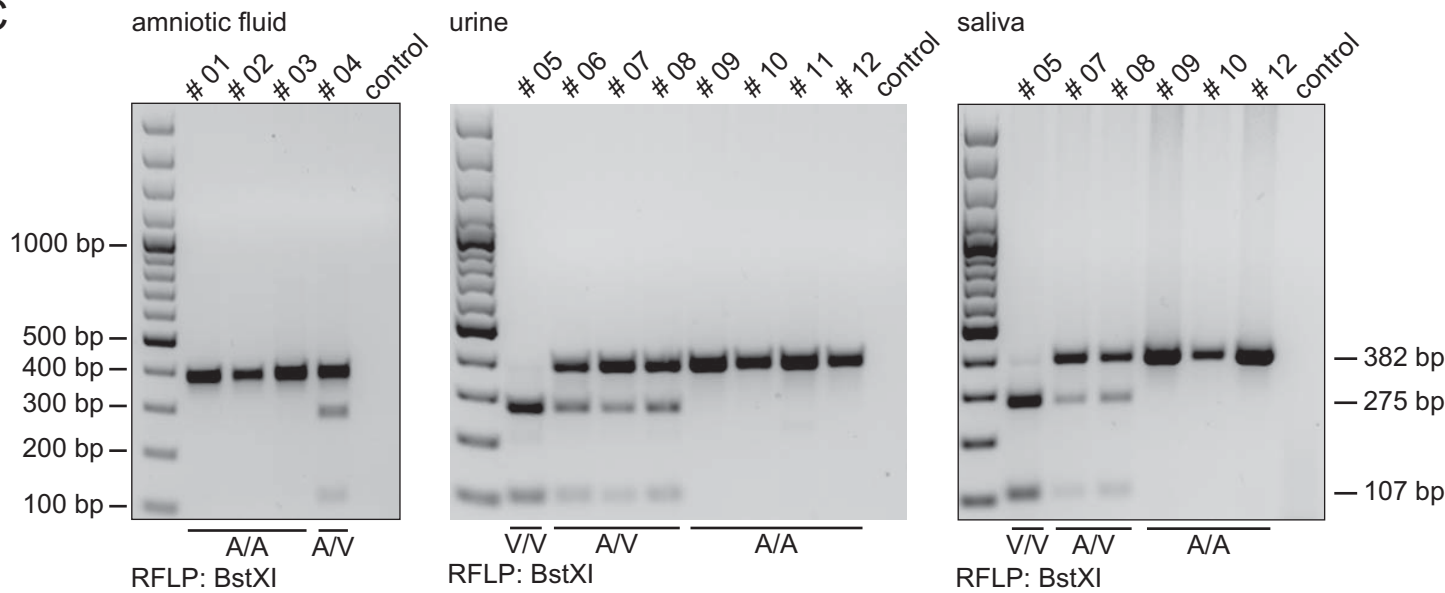

Supplement: 12967_2011_743_MOESM3_ESM.pdf [file 12967_2011_743_MOESM3_ESM.pdf]
